# Supplementary material
Source: PubMed Central journal article supplement (PMC2752723)
Supplement: NIHMS124184-supplement-supplemental.pdf [file NIHMS124184-supplement-supplemental.pdf]

## SUPPLEMENTARY MATERIAL

During the 1970s and early 1980s, studies of the mechanism of psychostimulant drugs focused on two questions: 1. determining whether psychostimulant action was mediated primarily by dopamine or norepinephrine, and 2. in the case of dopamine, determining the relative contribution of the mesoaccumbens and nigrostriatal pathway. A variety of strategies were employed, including different lesion methods and different targets, such as lesioning the dopamine nuclei, projection areas, or fibers of passage. When confronted with contradictory results, the variety of methods made it difficult to compare findings and resolve discrepancies. Nonetheless, it became evident that controlling the scope of the lesion so that it was, on one hand, sufficiently complete to achieve measurable behavioral effects while, on the other hand, sufficiently localized so as to not cause confounding collateral damage, was problematic. On the whole, these studies consistently demonstrated that the dorsal striatum was the critical substrate mediating psychostimulant induced stereotypy. The majority (though not all) of the studies found the nucleus accumbens to be critically involved in psychostimulant induced locomotor activity. Determining the role of the nigrostriatal pathway in the acute locomotor response, however, remained inconclusive. To our knowledge, a compelling demonstration of the role of the nigrostriatal pathway in mediating the acute locomotor response to psychostimulants is still lacking. In the supplementary table, we provide a partial list of studies that attempted to resolve this question and their findings.

| <b>Report</b>      | <b>Year</b> | <b>Lesion Method</b>                                           | <b>Findings</b>                                                                     | <b>DSt Required?</b> | <b>Comments</b>                                                                                                            |
|--------------------|-------------|----------------------------------------------------------------|-------------------------------------------------------------------------------------|----------------------|----------------------------------------------------------------------------------------------------------------------------|
| Naylor and Olley   | 1972        | Electrolytic lesion of caudate-putamen or globus pallidus      | No change in locomotor response to AMPH in lesioned rats                            | NO                   |                                                                                                                            |
| Creese and Iversen | 1972        | 6-OHDA injection into substantia nigra                         | 85-90% striatal DA depletion not sufficient to abolish AMPH locomotor response      | NO                   | Abolished stereotypy response but not locomotor response to AMPH                                                           |
| Creese and Iversen | 1973        | Intraventricular 6-OHDA injection at 5,7 or 9 days postnatally | Report 98% destruction of striatal DA terminals and loss of AMPH locomotor response | YES                  | Do not discriminate dorsal/ventral striatum; confounding destruction of noradrenergic system                               |
| Fibiger et al      | 1973        | 6-OHDA either intraventricularly or into substantia nigra      | Reduced AMPH locomotor response                                                     | YES                  | Intraventricular and SN administration showed same effect                                                                  |
| Costall and Naylor | 1973        | Electrolytic lesion of substantia nigra                        | No reduction in locomotor response to AMPH                                          | NO                   | Not specific to DA cells; effect of lesion dependent upon strain and activity levels prior to lesion                       |
| Neill et al        | 1974        | Electrolytic lesions of dorsal or ventral striatum             | Neither altered AMPH Locomotor response                                             | NO                   | Neither dorsal or ventral lesion altered locomotor response to AMPH; ventral lesion may have damaged nigrostriatal pathway |
| Iversen et al      | 1975        | 6-OHDA lesions of either caudate or nucleus accumbens          | Caudate, no effect; NAc, diminished locomotor response                              | NO                   | Caudate DA reduced by only 50%; Caudate lesion reduced stereotypy response                                                 |

|                    |      |                                                                                                                       |                                                                                                      |                           |                                                                                                                  |
|--------------------|------|-----------------------------------------------------------------------------------------------------------------------|------------------------------------------------------------------------------------------------------|---------------------------|------------------------------------------------------------------------------------------------------------------|
| Roberts et al      | 1975 | 6-OHDA lesion of substantia nigra (injection into zona incerta region)                                                | Report 92% depletion of dorsal striatal DA and severely reduced locomotor response to AMPH           | YES                       | May have lesioned part of ventral system as well.                                                                |
| Brook and Iversen  | 1975 | 6-OHDA lesion of substantia nigra                                                                                     | Reprot 80-90% loss of striatal DA; No reduction of locomotor response to AMPH in lesioned rats       | NO                        | Discussion of time-course of changes following lesions                                                           |
| Kelly et al        | 1975 | 6-OHDA lesions of either caudate or nucleus accumbens                                                                 | NAc lesions decreased AMPH locomotor response; DSt lesions did not                                   | NO                        | Only 51% depletion of striatal DA; Accumbens lesion resulted in 79% DA depletion and 89% noradrenaline depletion |
| Creese and Iversen | 1975 | 6-OHDA lesion of substantia nigra                                                                                     | Abolished locomotor response to AMPH and cocaine                                                     | YES                       | Lesions may have damaged mesoaccumbens fibers as well.                                                           |
| Pijnenburg et al   | 1975 | Injected haloperidol into the caudate and nucleus accumbens                                                           | haloperidol in NAc diminished locomotor response to AMPH; haloperidol in caudate did not             | NO                        | Injection in caudate may not have been extensive enough to observe behavioral alterations                        |
| Costall et al      | 1977 | 6-OHDA lesions of several areas, including central caudate, anterior caudate, nucleus accumbens and substantia nigra. | Neither the NAc or caudate lesions reduced locomotor response to AMPH; SN lesion increased response. | NO (NAc no effect either) | Provides a good summary of literature to date                                                                    |

|                   |      |                                                                                                                                   |                                                                                                                 |                           |                                                                                                                                                                                                                                                                                                               |
|-------------------|------|-----------------------------------------------------------------------------------------------------------------------------------|-----------------------------------------------------------------------------------------------------------------|---------------------------|---------------------------------------------------------------------------------------------------------------------------------------------------------------------------------------------------------------------------------------------------------------------------------------------------------------|
| Fink and Smith    | 1979 | 6-OHDA lesions of anterior caudate or nucleus accumbens                                                                           | No effect of dorsal or ventral lesion in total activity response to AMPH                                        | NO (NAc no effect either) | <ol style="list-style-type: none"> <li>1. No lesion of dorsal-lateral</li> <li>2. in an unusual measure of complete traversals across the chamber rather than total activity, the DSt lesion caused a reduction.</li> </ol>                                                                                   |
| Fink and Smith    | 1980 | Series of 6-OHDA lesions in different regions of striatum, ranging from exclusively accumbens to exclusively dorsomedial striatum | Both the dorsomedial and nucleus accumbens lesion resulted in only 20% diminution of locomotor response to AMPH | As important as NAc       | Concludes that specific region does not mediate locomotor response but that response is broadly distributed across striatum                                                                                                                                                                                   |
| Jones and Robbins | 1992 | 6-OHDA lesions of nucleus accumbens, caudate and prefrontal cortex                                                                | caudate lesion did not alter locomotor response                                                                 | NO                        | <ol style="list-style-type: none"> <li>1. In caudate lesion, DA reduced by 43% in anterior region and 76% in posterior region, lesion may not be sufficiently complete to observe effect.</li> <li>2. Accumbens lesion depleted dopamine in anterior caudate to greater extent than caudate lesion</li> </ol> |

**Supplementary Table.** Review of lesion studies examining role of dorsal striatum in locomotor response to psychostimulants. Abbreviations: AMPH, amphetamine; NAc, nucleus accumbens; SN, substantia nigra; DSt, dorsal striatum; 6-OHDA, 6 hydroxy dopamine; DA, dopamine.

## REFERENCES FOR TABLE

- Brook C, Iversen SD (1975) Changed eating and locomotor behaviour in the rat after 6-hydroxydopamine lesions to the substantia nigra. *Neuropharmacology* 14:95-105.
- Costall B, Naylor RJ (1973) The role of the substantia nigra in the locomotor stimulant action of amphetamine. *Br J Pharmacol* 49:29-36.
- Costall B, Marsden CD, Naylor RJ, Pycock CJ (1977) Stereotyped behaviour patterns and hyperactivity induced by amphetamine and apomorphine after discrete 6-hydroxydopamine lesions of extrapyramidal and mesolimbic nuclei. *Brain Res* 123:89-111.
- Creese I, Iversen SD (1972) Amphetamine response in rat after dopamine neurone destruction. *Nat New Biol* 238:247-248.
- Creese I, Iversen SD (1973) Blockage of amphetamine induced motor stimulation and stereotypy in the adult rat following neonatal treatment with 6-hydroxydopamine. *Brain Res* 55:369-382.
- Creese I, Iversen SD (1975) The pharmacological and anatomical substrates of the amphetamine response in the rat. *Brain Res* 83:419-436.
- Fibiger HC, Fibiger HP, Zis AP (1973) Attenuation of amphetamine-induced motor stimulation and stereotypy by 6-hydroxydopamine in the rat. *Br J Pharmacol* 47:683-692.
- Fink JS, Smith GP (1979) Abnormal pattern of amphetamine locomotion after 6-OHDA lesion of anteromedial caudate. *Pharmacol Biochem Behav* 11:23-30.
- Fink JS, Smith GP (1980) Relationships between selective denervation of dopamine terminal fields in the anterior forebrain and behavioral responses to amphetamine and apomorphine. *Brain Res* 201:107-127.
- Iversen SD, Kelly PH, Miller RJ, Seviour P (1975) Proceedings: Amphetamine and apomorphine responses in the rat after lesion of mesolimbic or striatal dopamine neurones. *Br J Pharmacol* 54:244P.
- Jones GH, Robbins TW (1992) Differential effects of mesocortical, mesolimbic, and mesostriatal dopamine depletion on spontaneous, conditioned, and drug-induced locomotor activity. *Pharmacol Biochem Behav* 43:887-895.
- Kelly PH, Seviour PW, Iversen SD (1975) Amphetamine and apomorphine responses in the rat following 6-OHDA lesions of the nucleus accumbens septi and corpus striatum. *Brain Res* 94:507-522.
- Naylor RJ, Olley JE (1972) Modification of the behavioural changes induced by amphetamine in the rat by lesions in the caudate nucleus, the caudate-putamen and globus pallidus. *Neuropharmacology* 11:91-99.
- Neill DB, Boggan WO, Grossman SP (1974) Behavioral effects of amphetamine in rats with lesions in the corpus striatum. *J Comp Physiol Psychol* 86:1019-1030.
- Pijnenburg AJ, Honig WM, Van Rossum JM (1975) Inhibition of d-amphetamine-induced locomotor activity by injection of haloperidol into the nucleus accumbens of the rat. *Psychopharmacologia* 41:87-95.
- Roberts DC, Zis AP, Fibiger HC (1975) Ascending catecholamine pathways and amphetamine-induced locomotor activity: importance of dopamine and apparent non-involvement of norepinephrine. *Brain Res* 93:441-454.

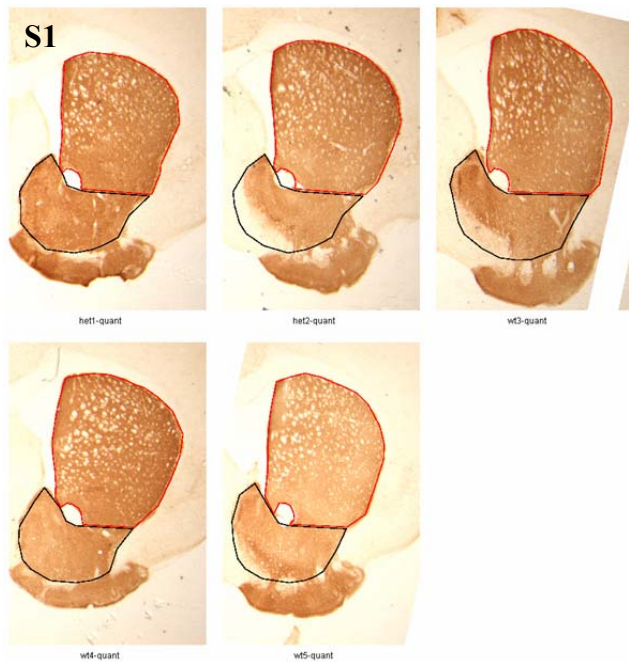

Figure S1 Sections and drawn regions of interest used to quantify TH reactivity in heterozygote and WT mice.

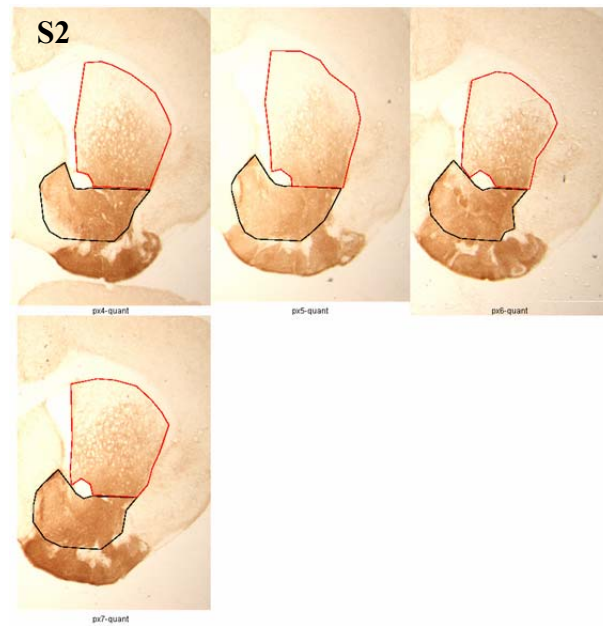

Figure S2 Sections and drawn regions of interest used to quantify TH reactivity in Pitx3-deficient mice older than 100 days.

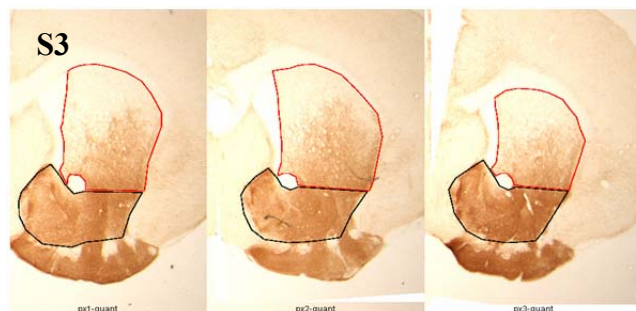

Figure S13 Sections and drawn regions of interest used to quantify TH reactivity in Pitx3-deficient mice younger than 100 days.

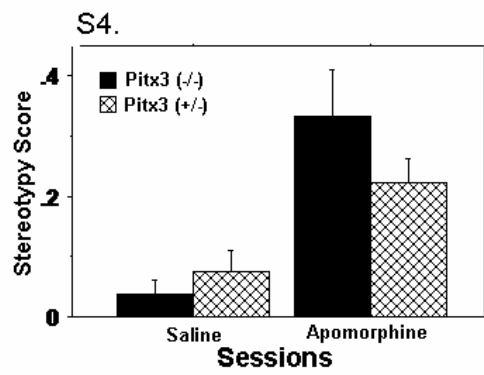

Figure S4. Stereotypy in response to apomorphine challenge. Mice were challenged with saline (left bars) and apomorphine (2 mg/kg, right bars) in two open field sessions on consecutive days. The sessions were recorded and stereotypy was visually scored as described in methods.
